# Supplementary material for: Cytotoxic Properties of HT-2 Toxin in Human Chondrocytes: Could T3 Inhibit Toxicity of HT-2?
Source: MDPI journal article supplement (doi:10.3390/toxins11110667), 2019-11-15
Supplement: s1 [file s1]

# Supplementary Materials: Cytotoxic Properties of HT-2 Toxin in Human Chondrocytes: Could T<sub>3</sub> Inhibit Toxicity of HT-2?

Feng'e Zhang, Mikko Juhani Lammi, Wanzhen Shao, Pan Zhang, Yanan Zhang, Haiyan Wei and Xiong Guo

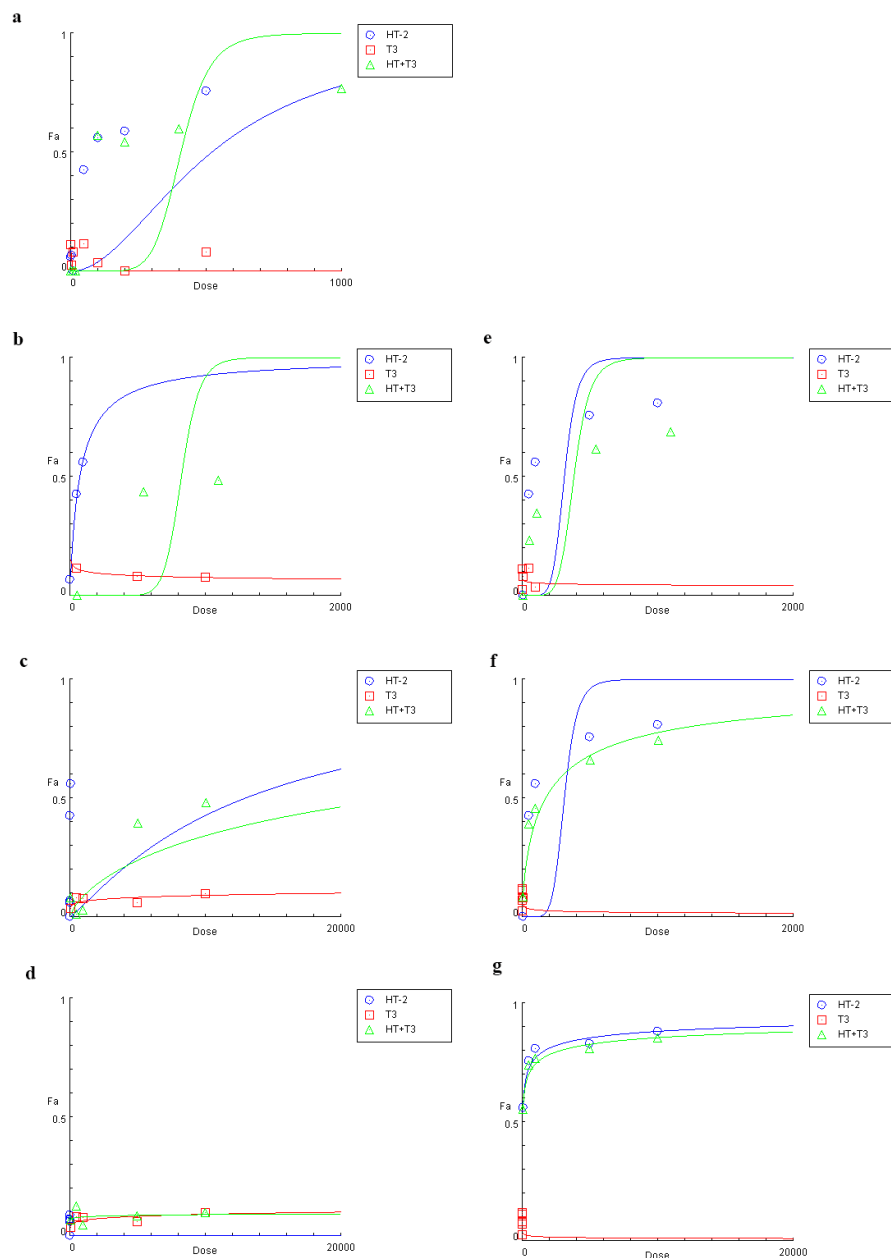

**Figure S1.** The dose-effect plot for figure 2 generated by CompuSyn software. Fa represents inhibition rate. The concentration ratios of HT-2:T3 were (a) 1:1, (b) 1:10, (c) 1:100, (d) 1:1000, (e) 10:1, (f) 100:1 and (g) 1000:1. The amounts of T3 and HT-2 toxin for each mixture are given in Table 1.
